# Supplementary material
Source: publisher figshare collection journal article supplement (https://geolsoc.figshare.com/ndownloader/files/17992898)
Supplement: Supplementary file 1 [file 17992898]

## Sheet: Larrovere et al SM Table 2 EPMA
SM Table 2. Monazite composition and EPMA geochronologic data
Sample 7541	Date	SiO2	Y2O3	PbO	ThO2	UO2	Th/U	Date	1 sigma
Analysis number	cluster	(wt.%)	(wt.%)	(wt.%)	(wt.%)	(wt.%)		(Ma)	(Ma)
7541Mz1c	III	0.3573	1.8706	0.1289	4.5015	0.4983	9.03	493	10
7541Mz1r	III	0.2139	3.2993	0.1431	3.697	0.9716	3.81	492	9
7541Mz2	III	0.2439	2.9475	0.1464	4.9931	0.5952	8.39	498	9
7541Mz3c	III	0.614	2.1525	0.1425	5.3106	0.4742	11.2	490	9
7541Mz3r	III	0.2375	2.8497	0.1379	4.4526	0.6654	6.69	489	9
7541Mz4	III	0.6397	1.9443	0.1032	4.0942	0.2932	13.96	483	11
7541Mz5	III	0.3701	2.7799	0.1406	4.3149	0.6628	6.51	511	10
7541Mz6c	III	0.5584	2.4472	0.1482	4.753	0.6817	6.97	498	9
7541Mz6r	III	0.2375	2.9755	0.1392	3.862	0.7948	4.86	507	10
7541Mz7	III	0.3894	2.625	0.132	4.1488	0.7058	5.88	483	9
7541Mz8	III	0.4621	2.3494	0.1069	3.8006	0.4118	9.23	489	11
7541Mz9	III	0.2717	2.7062	0.1385	4.5823	0.6419	7.14	490	9
7541Mz10	III	0.4043	2.1487	0.0905	3.119	0.4079	7.65	479	12
7541Mz11	III	0.3936	2.804	0.1378	3.911	0.7957	4.92	499	9
7541Mz12	III	0.2118	2.5284	0.1376	4.34	0.6558	6.62	500	9
7541Mz13r	III	0.2011	2.9729	0.1345	4.1625	0.666	6.25	499	10
7541Mz13c1*	III	0.6354	2.5132	0.1826	6.1686	0.7391	8.35	500	8
7541Mz13c2*	III	0.6653	2.6339	0.1976	6.6192	0.7647	8.66	510	8
7541Mz14	III	0.2075	2.8294	0.1373	4.2193	0.6804	6.2	503	10
Weighted mean age from date cluster III: 495 ± 5 Ma (2 sigma) (n=17).
* Discarded spots.
Sample 7621	Date	SiO2	Y2O3	PbO	ThO2	UO2	Th/U	Date	1 sigma
Analysis number	cluster	(wt.%)	(wt.%)	(wt.%)	(wt.%)	(wt.%)		(Ma)	(Ma)
7621Mz1	III	0.3701	1.5735	0.1109	3.7813	0.4005	9.44	511	10
7621Mz2c	IV	0.3145	1.5328	0.0901	3.3648	0.3338	10.08	474	11
7621Mz2r	III	0.3059	1.8122	0.1125	3.2635	0.5976	5.46	505	10
7621Mz3c	IV	0.2118	2.959	0.1599	4.5118	1.0734	4.2	469	7
7621Mz3r	IV	0.2075	3.4796	0.152	3.6436	1.2408	2.94	464	8
7621Mz4	IV	0.2482	1.9976	0.1379	4.5368	0.7738	5.86	461	8
7621Mz5c	IV	0.2524	1.9036	0.1501	4.6244	0.8844	5.23	471	7
7621Mz5r	IV	0.2204	2.23	0.1375	4.6939	0.6968	6.74	464	8
7621Mz6c	IV	0.2097	3.0834	0.1627	4.3491	1.1901	3.65	466	7
7621Mz6r	IV	0.2097	2.9209	0.1606	4.1477	1.2889	3.22	452	7
7621Mz7	IV	0.3509	1.7284	0.1253	4.4947	0.5539	8.11	468	9
7621Mz8	III	0.2204	2.4891	0.1333	4.4947	0.5936	7.57	488	9
7621Mz9	IV	0.2054	2.1868	0.1287	4.2353	0.7177	5.9	460	8
7621Mz10P1	IV	0.2011	2.7532	0.1437	4.5095	0.8942	5.04	455	8
7621Mz10P2*	V	0.3487	1.5125	0.0978	4.1283	0.3519	11.73	439	10
7621Mz10P3	IV	0.2717	2.6834	0.1401	4.2876	0.9114	4.7	453	8
7621MzAp1	III	0.3252	1.9227	0.1421	4.8645	0.6107	7.97	486	9
7621MzAp2	IV	0.2781	2.103	0.1371	4.7075	0.6253	7.53	478	9
7621MzAp3	III	0.2289	2.3976	0.1444	4.5789	0.7327	6.25	489	9
7621MzAp4	III	0.2375	3.0758	0.1566	4.1374	0.9611	4.3	504	9
7621MzAp6	III	0.2375	2.959	0.1569	4.3661	0.9223	4.73	498	9
7621MzAp7	III	0.2268	3.0606	0.1539	3.8165	1.0106	3.78	508	9
7621MzAp8	III	0.2396	3.1152	0.1702	4.3013	1.0486	4.1	517	9
7621MzAp9	IV	0.2417	3.2904	0.1709	4.6882	1.1109	4.22	483	8
Weighted mean age from date cluster III: 500 ± 8 Ma (2 sigma) (n=9).
Weighted mean age from date cluster IV: 465 ± 5 Ma (2 sigma) (n=14).
* Rejected spot.
Sample 14048	Date	SiO2	Y2O3	PbO	ThO2	UO2	Th/U	Date	1 sigma
Analysis number	cluster	(wt.%)	(wt.%)	(wt.%)	(wt.%)	(wt.%)		(Ma)	(Ma)
ACO48Mz1P2r	III	0.2524	1.9341	0.13	4.2159	0.6078	9.44	493	10
ACO48Mz1P3r	IV	0.3466	1.7551	0.1321	4.9476	0.4707	10.51	482	9
ACO48Mz1P4r	III	0.2118	2.4154	0.1374	4.0953	0.6879	5.95	511	10
ACO48Mz1P5r	IV	0.246	2.0154	0.1096	3.8529	0.4772	8.07	476	10
ACO48Mz1P7r	III	0.2225	2.917	0.1262	4.1499	0.5798	7.16	491	10
ACO48Mz1P8r	IV	0.2503	1.4858	0.1274	4.6313	0.5146	9	476	9
ACO48Mz2r	IV	0.2524	1.8846	0.1277	4.5084	0.5391	8.36	479	9
ACO48Mz2c	III	0.2781	2.437	0.1134	3.4353	0.5954	5.77	497	11
ACO48Mz3c	III	0.2524	2.8624	0.1349	5.0455	0.4406	11.45	492	9
ACO48Mz3r	III	0.4814	2.4802	0.1321	4.6165	0.5044	9.15	498	10
ACO48Mz4gr (GR)	IV	0.2824	1.3703	0.1027	3.375	0.5232	6.45	479	11
ACO48Mz5c	III	0.2417	3.3933	0.1604	4.1203	1.1052	3.73	488	8
ACO48Mz5r	III	0.2546	3.4365	0.1667	4.1056	1.1689	3.51	494	8
ACO48Mz6c	III	0.2738	1.9913	0.1564	5.1843	0.7052	7.35	493	8
ACO48Mz7c	III	0.261	3.2358	0.1545	4.2819	0.9523	4.5	491	9
ACO48Mz8c	III	0.3787	2.6745	0.1377	4.472	0.6108	7.32	500	9
ACO48Mz9c	III	0.338	2.0662	0.1608	5.6679	0.6297	9	489	8
ACO48Mz10c (GC)	III	0.2631	2.8358	0.1295	4.3809	0.5694	7.69	487	10
ACO48Mz11c	III	0.3016	1.8706	0.137	4.8691	0.4893	9.95	497	9
ACO48Mz12gr (GC)	III	0.3123	2.9437	0.1343	4.3718	0.5592	7.82	510	10
ACO48Mz13gr (GR)	IV	0.2524	1.7335	0.1293	4.7223	0.5095	9.27	476	9
ACO48Mz14P1 (GC)	III	0.2225	2.7139	0.1356	4.3058	0.6538	6.59	497	9
ACO48Mz14P2 (GC)	III	0.2246	3.0364	0.1404	4.3036	0.6334	6.79	518	10
ACO48Mz14P3 (GC)	III	0.2268	3.1812	0.1375	4.3183	0.631	6.84	506	10
ACO48Mz15	III	0.2567	2.3291	0.1497	4.8611	0.6629	7.33	502	9
ACO48Mz16	III	0.2289	2.164	0.1514	4.2626	0.8752	4.87	498	9
ACO48Mz17r	III	0.261	1.5938	0.1366	4.5937	0.5749	7.99	496	9
ACO48Mz17c	III	0.2396	3.2777	0.1328	4.2284	0.6111	6.92	503	10
ACO48Mz18	III	0.2909	2.357	0.1587	5.3197	0.6715	7.92	496	9
ACO48Mz19	III	0.2375	2.0992	0.1406	4.4879	0.7117	6.31	487	9
ACO48Mz20c	III	0.2204	3.0428	0.1341	4.1704	0.6103	6.83	514	10
ACO48Mz20r	IV	0.3059	1.4871	0.1254	4.5516	0.5071	8.98	475	9
ACO48Mz21	III	0.2375	2.6923	0.1212	3.8973	0.5723	6.81	496	10
ACO48Mz22	IV	0.3016	1.4592	0.1252	4.7451	0.4549	10.43	473	9
ACO48Mz23c	III	0.2054	2.7431	0.1092	2.9756	0.6765	4.4	497	11
ACO48Mz23r	IV	0.2182	2.0992	0.1054	2.6354	0.7636	3.45	483	11
ACO48Mz24c	III	0.2182	2.8256	0.134	4.2626	0.645	6.61	495	10
ACO48Mz24r	III	0.2289	2.338	0.1373	4.4663	0.6063	7.37	500	9
ACO48Mz25	III	0.2246	3.0504	0.1297	4.2398	0.5918	7.16	494	10
ACO48Mz26c	III	0.2482	2.597	0.1472	4.1499	0.8839	4.69	493	9
ACO48Mz26r	IV	0.3081	1.623	0.1312	4.4788	0.5994	7.47	481	9
Weighted mean age from date cluster III: 497 ± 3 Ma (2 sigma) (n=31).
Weighted mean age from date cluster IV: 478 ± 6 Ma (2 sigma) (n=10).
(GR) Monazite included in garnet rim; (GC) Monazite included in garnet core.
Sample 14049	Date	SiO2	Y2O3	PbO	ThO2	UO2	Th/U	Date	1 sigma
Analysis number	cluster	(wt.%)	(wt.%)	(wt.%)	(wt.%)	(wt.%)		(Ma)	(Ma)
ACO49Mz5p1	II	0.2011	1.656	0.1435	4.8486	0.4849	10	523	9
ACO49Mz5p2	II	0.1947	1.8986	0.1354	4.3013	0.5063	8.5	535	10
ACO49Mz5p3	II	0.2011	2.2427	0.1462	4.6313	0.5622	8.24	532	9
ACO49Mz1p1	II	0.2032	3.2752	0.1627	3.631	1.0707	3.39	534	9
ACO49Mz1p2	IV	0.2225	2.1678	0.2146	3.6766	2.0767	1.77	481	7
ACO49Mz1p3	IV	0.2567	2.1068	0.2179	3.8711	2.0767	1.86	479	7
ACO49Mz6c*	I	0.4728	2.5399	0.1964	7.0584	0.3265	21.62	568	8
ACO49Mz6r1	V	0.2995	2.0865	0.1076	4.2956	0.3895	11.03	456	10
ACO49Mz7p1*	II	0.5648	2.103	0.2457	9.7052	0.4479	21.67	519	7
ACO49Mz7p2	II	0.3487	2.5462	0.1472	5.9774	0.1605	37.24	533	9
ACO49Mz7p3	II	0.2781	2.545	0.1472	5.9194	0.2845	20.81	505	9
ACO49Mz7p4	II	0.2204	3.0529	0.1427	4.9328	0.4379	11.26	527	9
ACO49Mz9p1	IV	0.3936	1.7932	0.1798	7.0266	0.4753	14.78	493	8
ACO49Mz9p3	II	0.2289	2.2783	0.1544	5.5848	0.476	11.73	510	9
ACO49Mz8c	II	0.2353	3.5609	0.1615	4.2569	0.9456	4.5	518	9
ACO49Mz8r	II	1.1424	1.8262	0.1855	4.1841	1.2138	3.45	533	8
Weighted mean age from date cluster II: 525 ± 8 Ma (2 sigma) (n=10).
Weighted mean age from date cluster IV: 483 ± 8 Ma (2 sigma) (n=3).
* Discarded/rejected spots.
Sample 14057	Date	SiO2	Y2O3	PbO	ThO2	UO2	Th/U	Date	1 sigma
Analysis number	cluster	(wt.%)	(wt.%)	(wt.%)	(wt.%)	(wt.%)		(Ma)	(Ma)
ACO57Mz4p1	IV	0.4728	1.6877	0.1042	4.2762	0.2739	15.61	474	11
ACO57Mz4p2	IV	0.3744	2.3595	0.1445	5.4232	0.5382	10.08	475	8
ACO57Mz4p3	IV	0.3872	3.1101	0.1716	6.5099	0.5634	11.55	484	8
ACO57Mz9c	IV	0.3765	2.4916	0.1443	5.9262	0.3514	16.86	482	9
ACO57Mz9r	IV	0.3829	2.7443	0.1634	5.9729	0.544	10.98	495	8
ACO57Mz6p1	II	0.368	3.2396	0.1914	6.4769	0.7451	8.69	507	8
ACO57Mz6p2*	V	0.8985	2.6275	0.3228	14.5481	1.0531	13.81	425	5
ACO57Mz6p3	IV	0.2182	3.6638	0.1237	3.9178	0.7344	5.33	463	9
ACO57Mz5c	IV	0.3273	2.8243	0.1497	5.4688	0.5561	9.83	485	8
ACO57Mz7c	II	0.2781	2.8701	0.1457	4.1989	0.6578	6.38	540	10
ACO57Mz23p1	IV	0.2824	1.9633	0.1549	4.786	0.7984	5.99	493	8
ACO57Mz23p3	II	0.249	2.4662	0.1539	4.4731	0.7537	5.93	521	9
ACO57Mz24p1	II	0.2439	3.4619	0.1836	5.0398	1.0079	5	518	8
ACO57Mz24p2	II	0.2375	2.5437	0.1837	5.2218	0.8843	5.91	532	8
ACO57Mz24p3	II	0.2439	2.5348	0.1826	5.2844	0.9077	5.82	521	8
ACO57Mz26p1	II	0.2396	2.9272	0.1458	4.72	0.5186	9.1	535	9
ACO57Mz26p2	II	0.2246	2.7748	0.1416	4.4549	0.5338	8.35	535	10
ACO57Mz26p3*	I	0.2589	2.3227	0.152	4.8031	0.5079	9.46	551	9
ACO57Mz26p5*	V	0.2589	1.7512	0.1168	5.0876	0.3144	16.18	452	9
ACO57Mz21c	II	0.2439	3.1152	0.1738	5.6372	0.69	8.17	518	8
ACO57Mz21r	II	0.4428	1.6052	0.1786	7.0118	0.3812	18.39	511	8
ACO57Mz20c	III	0.2482	1.9087	0.1376	4.2558	0.6813	6.25	500	9
ACO57Mz19c	II	0.323	2.8142	0.1742	5.6486	0.6514	8.67	526	8
ACO57Mz19r	II	0.2674	2.4751	0.1367	4.373	0.515	8.49	529	10
ACO57Mz16p1	II	0.2931	2.2732	0.1847	5.5382	0.9232	6	509	8
ACO57Mz16p2	II	0.2503	2.9259	0.1531	4.9522	0.5716	8.66	527	9
ACO57Mz16p3	IV	0.2631	2.8574	0.1557	5.6349	0.6004	9.39	484	8
ACO57Mz16p4	II	0.3123	1.9595	0.1725	6.2016	0.4904	12.65	519	8
Weighted mean age from date cluster II: 522 ± 6 Ma (2 sigma) (n=15).
Weighted mean age from date cluster IV: 484 ± 8 Ma (2 sigma) (n=10).
* Discarded/rejected spots.
Sample 14067	Date	SiO2	Y2O3	PbO	ThO2	UO2	Th/U	Date	1 sigma
Analysis number	cluster	(wt.%)	(wt.%)	(wt.%)	(wt.%)	(wt.%)		(Ma)	(Ma)
ACO67Mz1	VI	0.46	1.4566	0.0976	4.4731	0.3612	12.38	408	9
ACO67Mz2	V	0.3573	1.6928	0.1141	4.1329	0.6117	6.76	437	9
ACO67Mz3	V	0.5413	1.8567	0.1104	3.8416	0.6157	6.24	446	9
ACO67Mz4	IV	0.7466	1.5608	0.1015	4.3695	0.2439	17.92	465	10
ACO67Mz5	IV	0.3637	1.5938	0.0831	2.6752	0.423	6.32	480	12
ACO67Mz6c1*	VI	0.18	0.9118	0.0414	1.8047	0.1582	11.41	417	20
ACO67Mz6c2*	V	0.154	0.8928	0.0281	1.3814	0.0439	31.47	434	30
ACO67Mz6r	V	0.2674	1.0109	0.0675	2.8789	0.2641	10.9	425	13
ACO67Mz7	IV	0.3273	1.4261	0.0958	3.482	0.3671	9.49	482	11
ACO67Mz8	IV	0.3808	1.4795	0.1319	4.4868	0.5869	7.64	486	8
ACO67Mz9	IV	0.3038	1.5417	0.1298	4.258	0.6643	6.41	474	8
ACO67Mz10	IV	0.3016	1.703	0.1299	4.3434	0.6887	6.31	463	8
ACO67Mz11	V	0.4193	1.2242	0.0574	2.3907	0.2568	9.31	424	15
ACO67Mz12c	II	0.4814	1.4655	0.1141	4.1943	0.3255	12.89	512	10
ACO67Mz12r	IV	0.492	1.5277	0.1204	4.9021	0.336	14.59	473	9
ACO67Mz14	IV	0.4108	1.4414	0.1191	4.5698	0.4775	9.57	460	14
ACO67Mz15	IV	0.445	1.7652	0.1161	3.9554	0.488	8.11	495	9
ACO67Mz16c	VI	0.3	1.6446	0.109	4.1283	0.6253	6.6	417	10
ACO67Mz16r	V	0.3081	1.9798	0.1089	3.6675	0.6894	5.32	434	9
ACO67Mz17	V	0.4514	1.3309	0.1433	6.2425	0.3631	17.19	455	12
ACO67Mz19	IV	0.3423	1.5049	0.1343	5.0182	0.5758	8.72	459	10
ACO67Mz20	II	0.4001	1.3957	0.0864	3.4012	0.1373	24.77	529	9
ACO67Mz21c	IV	0.2738	1.2357	0.0649	2.3418	0.2537	9.23	483	10
ACO67Mz21r	V	0.2867	2.0421	0.1119	3.6458	0.702	5.19	444	9
ACO67Mz22r	V	0.261	1.9849	0.1142	3.7084	0.7016	5.29	449	10
ACO67Mz23	V	0.3744	1.0706	0.0834	3.6458	0.2663	13.69	436	9
ACO67Mz25	VI	0.31	1.0845	0.0454	2.2383	0.1352	16.56	401	9
ACO67Mz26	V	0.3059	1.5303	0.1143	3.7938	0.7136	5.32	440	15
ACO67Mz27	VI	0.31	1.228	0.0631	2.9722	0.2057	14.45	409	10
ACO67MZAp1	V	0.5798	1.1658	0.1183	5.421	0.292	18.57	437	10
ACO67MZAp2	IV	0.3615	1.4007	0.1194	4.5289	0.4857	9.32	459	10
ACO67MZAp4*	V	0.2952	1.0934	0.0458	1.8889	0.16	11.81	447	23
ACO67MZAp5	IV	0.3466	1.0604	0.0704	2.9813	0.183	16.29	463	16
Weighted mean age from date cluster IV: 474 ± 7 Ma (2 sigma) (n=13).
Weighted mean age from date cluster V: 440 ± 6 Ma (2 sigma) (n=11).
Weighted mean age from date cluster VI: 408 ± 9 Ma (2 sigma) (n=4).
* Discarded spots.
